# Supplementary material for: Mosquito Communities Vary across Landscape and Vertical Strata in Indian River County, Florida
Source: MDPI journal article supplement (doi:10.3390/pathogens10121575), 2021-12-03
Supplement: s1 [file s1]

**Table S1.** Total collected mosquito counts organized by height, landscape, and site. Site numbers correspond to Figure 1. HH – Hydric Hammock, MH – Mixed Hardwood-Coniferous, SP – Scrubby Pine.

| Species                          | Height (m) |      |      | Landscape |      |      | Site |      |      |      |      |
|----------------------------------|------------|------|------|-----------|------|------|------|------|------|------|------|
|                                  | 1.5        | 5.0  | 8.7  | HH        | MH   | SP   | 1    | 2    | 3    | 4    | 5    |
| <i>Aedes albopictus</i>          | 2          | 0    | 0    | 1         | 0    | 1    | 1    | 0    | 0    | 1    | 0    |
| <i>Aedes atlanticus</i>          | 3          | 0    | 0    | 2         | 0    | 1    | 1    | 0    | 0    | 2    | 0    |
| <i>Aedes infirmatus</i>          | 1          | 0    | 0    | 0         | 0    | 1    | 1    | 0    | 0    | 0    | 0    |
| <i>Aedes pertinax</i>            | 1          | 0    | 0    | 1         | 0    | 0    | 0    | 1    | 0    | 0    | 0    |
| <i>Aedes taeniorhynchus</i>      | 317        | 47   | 42   | 170       | 78   | 158  | 158  | 40   | 49   | 130  | 29   |
| <i>Anopheles crucians</i>        | 273        | 12   | 4    | 29        | 42   | 218  | 218  | 7    | 30   | 22   | 12   |
| <i>Anopheles quadrimaculatus</i> | 9          | 30   | 108  | 120       | 23   | 4    | 4    | 116  | 18   | 4    | 5    |
| <i>Culex atratus</i>             | 0          | 1    | 0    | 1         | 0    | 0    | 0    | 1    | 0    | 0    | 0    |
| <i>Culex cedecei</i>             | 3          | 0    | 0    | 3         | 0    | 0    | 0    | 3    | 0    | 0    | 0    |
| <i>Culex coronator</i>           | 11         | 1    | 1    | 3         | 6    | 4    | 4    | 1    | 3    | 2    | 3    |
| <i>Culex declarator</i>          | 0          | 1    | 0    | 0         | 1    | 0    | 0    | 0    | 1    | 0    | 0    |
| <i>Culex erraticus</i>           | 17         | 5    | 0    | 8         | 13   | 1    | 1    | 7    | 4    | 1    | 9    |
| <i>Culex interrogator</i>        | 0          | 1    | 0    | 0         | 1    | 0    | 0    | 0    | 0    | 0    | 1    |
| <i>Culex iolambdis</i>           | 1          | 0    | 2    | 3         | 0    | 0    | 0    | 3    | 0    | 0    | 0    |
| <i>Culex nigripalpus</i>         | 4141       | 4000 | 3577 | 5617      | 4695 | 1406 | 1406 | 2417 | 2293 | 3200 | 2402 |
| <i>Culex quinquefasciatus</i>    | 5          | 0    | 4    | 0         | 5    | 4    | 4    | 0    | 4    | 0    | 1    |
| <i>Culex salinarius</i>          | 15         | 18   | 11   | 23        | 19   | 2    | 2    | 15   | 8    | 8    | 11   |
| <i>Deinocerites cancer</i>       | 16         | 5    | 10   | 26        | 5    | 0    | 0    | 26   | 4    | 0    | 1    |
| <i>Mansonia titillans</i>        | 8          | 4    | 15   | 10        | 14   | 3    | 3    | 6    | 6    | 4    | 8    |
| <i>Wyeomyia mitchelli</i>        | 1          | 0    | 0    | 0         | 1    | 0    | 0    | 0    | 1    | 0    | 0    |
| <i>Wyeomyia vanduzeei</i>        | 9          | 2    | 2    | 3         | 10   | 0    | 0    | 0    | 7    | 3    | 3    |
| Damaged specimens                | 16         | 69   | 8    | 47        | 44   | 2    | 2    | 0    | 7    | 3    | 3    |
| Males                            | 0          | 1    | 0    | 0         | 1    | 0    | 0    | 0    | 0    | 1    | 0    |

**Table S2.** Mean number of mosquitoes per trap night and richness by height and landscape. Standard deviation is in parenthesis. Values followed by the same letter are not significant different ( $p < 0.05$ ). .

| Species                                       | Height (m)  |           |            | Landscape      |                           |              |
|-----------------------------------------------|-------------|-----------|------------|----------------|---------------------------|--------------|
|                                               | 1.5         | 5.0       | 8.7        | Hydric Hammock | Mixed Hardwood-Coniferous | Scrubby Pine |
| <i>Aedes albopictus</i>                       | 0.0 (0.0)   | 0.0 (0.0) | 0.1 (0.3)  | 0.0 (0.2)      | 0.0 (0.0)                 | 0.1 (0.3)    |
| <i>Aedes atlanticus</i>                       | 0.2 (0.5)   | 0.0 (0.0) | 0.0 (0.0)  | 0.1 (0.4)      | 0.0 (0.0)                 | 0.1 (0.3)    |
| <i>Aedes infirmatus</i>                       | 0.1 (0.2)   | 0.0 (0.0) | 0.0 (0.0)  | 0.0 (0.0)      | 0.0 (0.0)                 | 0.1 (0.3)    |
| <i>Aedes pertinax</i>                         | 0.1 (0.2)   | 0.0 (0.0) | 0.0 (0.0)  | 0.1 (0.2)      | 0.0 (0.0)                 | 0.0 (0.0)    |
| <i>Aedes taeniorhynchus</i> <sup>1</sup>      | 15.9 (25.2) | 2.4 (4.3) | 2.1 (3.0)  | 7.1 (15.0)     | 3.3 (3.9)                 | 13.2 (28.1)  |
| <i>Anopheles crucians</i> <sup>1</sup>        | 13.7 (25.4) | 0.6 (1.2) | 0.2 (0.5)  | 1.2 (2.7)      | 1.8 (2.9)                 | 18.2 (32.5)  |
| <i>Anopheles quadrimaculatus</i> <sup>1</sup> | 0.5 (0.7)   | 1.5 (4.3) | 5.4 (13.0) | 5.0 (12.2)     | 1.0 (2.7)                 | 0.3 (0.5)    |
| <i>Culex atratus</i>                          | 0.0 (0.0)   | 0.1 (0.2) | 0.0 (0.0)  | 0.1 (0.2)      | 0.0 (0.0)                 | 0.0 (0.0)    |
| <i>Culex cedecei</i>                          | 0.2 (0.7)   | 0.0 (0.0) | 0.0 (0.0)  | 0.1 (0.6)      | 0.0 (0.0)                 | 0.0 (0.0)    |

|                                            |               |               |               |               |               |               |
|--------------------------------------------|---------------|---------------|---------------|---------------|---------------|---------------|
| <i>Culex coronator</i> <sup>1</sup>        | 0.6 (1.1)     | 0.1 (0.2)     | 0.1 (0.2)     | 0.1 (0.4)     | 0.3 (0.6)     | 0.3 (1.2)     |
| <i>Culex declarator</i>                    | 0.0 (0.0)     | 0.1 (0.2)     | 0.0 (0.0)     | 0.0 (0.0)     | 0.0 (0.2)     | 0.0 (0.0)     |
| <i>Culex erraticus</i> <sup>1</sup>        | 0.9 (1.6)     | 0.3 (.6)      | 0.0 (0.0)     | 0.3 (0.9)     | 0.5 (1.3)     | 0.1 (0.3)     |
| <i>Culex interrogator</i>                  | 0.0 (0.0)     | 0.1 (0.2)     | 0.0 (0.0)     | 0.0 (0.0)     | 0.0 (0.2)     | 0.0 (0.0)     |
| <i>Culex iolambdis</i> <sup>1</sup>        | 0.1 (0.2)     | 0.0 (0.0)     | 0.1 (0.4)     | 0.1 (0.4)     | 0.0 (0.0)     | 0.0 (0.0)     |
| <i>Culex nigripalpus</i> <sup>1</sup>      | 207.0 (185.9) | 200.0 (211.5) | 178.8 (222.2) | 234.0 (236.6) | 195.6 (187.9) | 117.2 (148.9) |
| <i>Culex quinquefasciatus</i> <sup>1</sup> | 0.3 (0.6)     | 0.0 (0.0)     | 0.2 (0.5)     | 0.0 (0.0)     | 0.2 (0.5)     | 0.3 (0.8)     |
| <i>Culex salinarius</i> <sup>1</sup>       | 0.8 (1.1)     | 0.9 (1.8)     | 0.6 (1.4)     | 1.0 (1.4)     | 0.8 (1.7)     | 0.2 (0.4)     |
| <i>Deinocerites cancer</i> <sup>1</sup>    | 0.8 (3.4)     | 0.3 (0.6)     | 0.5 (0.9)     | 1.1 (3.1)     | 0.2 (0.7)     | 0.0 (0.0)     |
| <i>Mansoni titillans</i> <sup>1</sup>      | 0.4 (0.7)     | 0.2 (0.4)     | 0.8 (1.1)     | 0.4 (0.7)     | 0.6 (1.0)     | 0.3 (0.6)     |
| <i>Wyeomyi mitchelli</i> <sup>1</sup>      | 0.1 (0.2)     | 0.0 (0.0)     | 0.0 (0.0)     | 0.0 (0.0)     | 0.1 (0.2)     | 0.0 (0.0)     |
| <i>Wyeomyi vanduzeei</i> <sup>1</sup>      | 0.5 (0.9)     | 0.1 (0.3)     | 0.1 (0.3)     | 0.1 (0.3)     | 0.4 (0.9)     | 0.0 (0.0)     |
| Richness <sup>2</sup>                      | 5.3 (1.7)     | 3.3 (1.6)     | 3.4 (1.9)     | 4.2 (1.9)     | 4.1 (1.8)     | 3.2 (2.2)     |

<sup>1</sup>Significant difference was assessed by generalized linear mixed effects model.

**Table S3.** Results of generalized linear mixed effect models of mosquito species abundances captured at different heights. ZINB, zero-inflated negative binomial; ZIP, zero-inflated poisson.

| Species                         | Variable  | Conditional Model |         |          |
|---------------------------------|-----------|-------------------|---------|----------|
|                                 |           | Coefficient (se)  | z value | Pr(> z ) |
| <i>Ae. taeniorhynchus</i> ZINB  | Intercept | 2.762 (0.366)     | 7.547   | < 0.001  |
|                                 | 1.5 m     | Ref.              |         |          |
|                                 | 5.0 m     | −1.909 (0.535)    | −3.568  | < 0.001  |
|                                 | 8.7 m     | −2.021 (0.537)    | −3.762  | < 0.001  |
| <i>An. crucians</i> ZINB        | Intercept | 2.074 (0.530)     | 3.912   | < 0.001  |
|                                 | 1.5 m     | Ref.              |         |          |
|                                 | 5.0 m     | −2.631 (0.619)    | −4.321  | < 0.001  |
|                                 | 8.7 m     | −4.046 (0.713)    | −5.679  | < 0.001  |
| <i>An. quadrimaculatus</i> ZINB | Intercept | −0.850 (0.730)    | −1.165  | 0.244    |
|                                 | 1.5 m     | Ref.              |         |          |
|                                 | 5.0 m     | 0.591 (0.798)     | 0.740   | 0.459    |
|                                 | 8.7 m     | 1.726 (0.780)     | 2.212   | 0.027    |
| <i>Cx. coronator</i> ZIP        | Intercept | 0.610 (0.376)     | 1.623   | 0.105    |
|                                 | 1.5 m     | Ref.              |         |          |
|                                 | 5.0 m     | −2.429 (1.143)    | −2.126  | 0.034    |
|                                 | 8.7 m     | −2.429 (1.143)    | −2.126  | 0.034    |
| <i>Cx. erraticus</i> ZIP        | Intercept | −0.954 (0.548)    | −1.743  | 0.081    |
|                                 | 1.5 m     | Ref.              |         |          |
|                                 | 5.0 m     | −1.14 (0.709)     | −1.605  | 0.108    |
|                                 | 8.7 m     | -                 | -       | -        |
| <i>Cx. iolambdis</i> ZIP        | Intercept | −6.871 (5.824)    | −1.180  | 0.238    |
|                                 | 1.5 m     | Ref.              |         |          |
|                                 | 5.0 m     | -                 | -       | -        |
|                                 | 8.7 m     | 0.965 (1.423)     | 0.678   | 0.498    |
| <i>Cx. nigripalpus</i> ZIP      | Intercept | 4.787 (0.250)     | 19.133  | <0.001   |
|                                 | 1.5 m     | Ref.              |         |          |
|                                 | 5.0 m     | −0.011 (0.354)    | −0.032  | 0.975    |
|                                 | 8.7 m     | −0.186 (0.354)    | −0.525  | 0.599    |
| <i>Cx. quinquefasciatus</i> ZIP | Intercept | 0.024 (0.061)     | 0.036   | 0.971    |
|                                 | 1.5 m     | Ref.              |         |          |
|                                 | 5.0 m     | -                 | -       | -        |
|                                 | 8.7 m     | −0.327 (0.810)    | −0.403  | 0.687    |

|                           |           |                |        |       |
|---------------------------|-----------|----------------|--------|-------|
| <i>Cx. salinarius</i> ZIP | Intercept | 0.393 (0.369)  | 1.066  | 0.286 |
|                           | 1.5 m     | Ref.           |        |       |
|                           | 5.0 m     | 0.494 (0.461)  | 1.072  | 0.284 |
|                           | 8.7 m     | 0.229 (0.584)  | 0.392  | 0.695 |
| <i>De. cancer</i> ZIP     | Intercept | −3.642 (1.510) | −2.412 | 0.016 |
|                           | 1.5 m     | Ref.           |        |       |
|                           | 5.0 m     | 0.122 (1.094)  | 0.112  | 0.911 |
|                           | 8.7 m     | 0.937 (1.024)  | 0.916  | 0.360 |
| <i>Ma. titillans</i> ZINB | Intercept | −0.916 (0.392) | −2.340 | 0.019 |
|                           | 1.5 m     | Ref.           |        |       |
|                           | 5.0 m     | −0.693 (0.657) | −1.055 | 0.291 |
|                           | 8.7 m     | 0.629 (0.498)  | 1.261  | 0.207 |
| <i>Wy. vanduzeei</i> ZINB | Intercept | −1.147 (0.718) | −1.598 | 0.110 |
|                           | 1.5 m     | Ref.           |        |       |
|                           | 5.0 m     | −1.601 (0.898) | −1.782 | 0.075 |
|                           | 8.7 m     | −1.549 (0.891) | −1.739 | 0.082 |

**Table S4.** Summary of mosquito pool testing for presence of WNV by an RT-PCR assay. .

| Species                          | Total Number of mosquitoes tested | Number of Pools | Average Pool Size | No. Positive Pools |
|----------------------------------|-----------------------------------|-----------------|-------------------|--------------------|
| <i>Aedes albopictus</i>          | 2                                 | 2               | 1.0               | 0                  |
| <i>Aedes atlanticus</i>          | 3                                 | 2               | 1.5               | 0                  |
| <i>Aedes infirmatus</i>          | 1                                 | 1               | 1.0               | 0                  |
| <i>Aedes pertinax</i>            | 1                                 | 1               | 1.0               | 0                  |
| <i>Aedes taeniorhynchus</i>      | 412                               | 39              | 10.6              | 0                  |
| <i>Anopheles crucians</i>        | 289                               | 26              | 11.1              | 0                  |
| <i>Anopheles quadrimaculatus</i> | 147                               | 21              | 7.0               | 0                  |
| <i>Culex atratus</i>             | 1                                 | 1               | 1.0               | 0                  |
| <i>Culex cedecei</i>             | 6                                 | 2               | 3.0               | 0                  |
| <i>Culex coronator</i>           | 13                                | 7               | 1.9               | 0                  |
| <i>Culex declarator</i>          | 1                                 | 1               | 1.0               | 0                  |
| <i>Culex erraticus</i>           | 22                                | 12              | 1.8               | 0                  |
| <i>Culex interrogator</i>        | 1                                 | 1               | 1.0               | 0                  |
| <i>Culex iolambdis</i>           | 3                                 | 2               | 1.5               | 0                  |
| <i>Culex nigripalpus</i>         | 5953                              | 123             | 48.4              | 0                  |
| <i>Culex quinquefasciatus</i>    | 9                                 | 6               | 1.5               | 0                  |
| <i>Culex salinarius</i>          | 45                                | 18              | 2.5               | 0                  |
| <i>Deinocerites cancer</i>       | 31                                | 11              | 2.8               | 0                  |
| <i>Mansonia titillans</i>        | 27                                | 19              | 1.4               | 0                  |
| <i>Wyeomyia mitchelli</i>        | 1                                 | 1               | 1.0               | 0                  |
| <i>Wyeomyia vanduzeei</i>        | 13                                | 9               | 1.4               | 0                  |

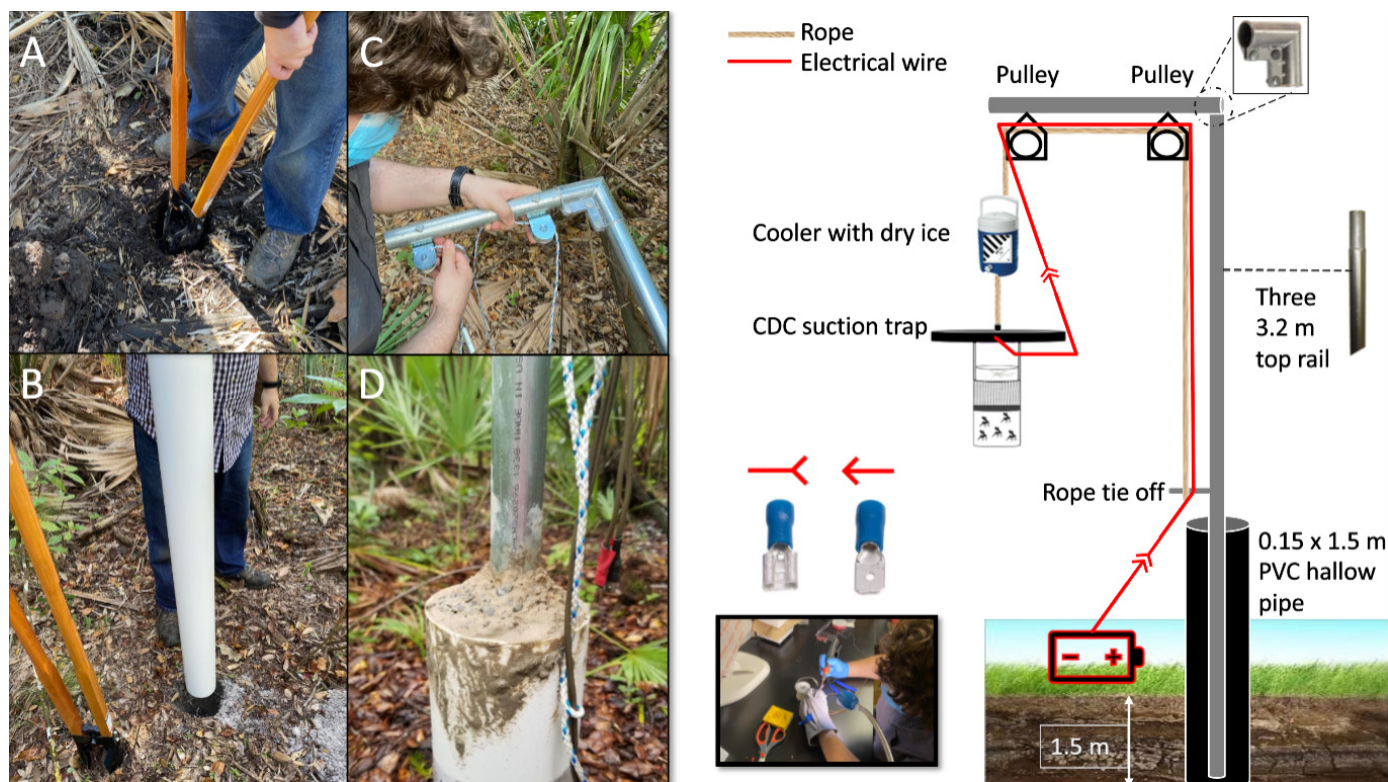

**Figure S1.** Canopy trap construction. (A) A 0.9 m hole was dug using a fence-post digger. (B) A 1.5 m PVC pipe was secured in place using sand and a dowel was used to pack the sand. (C) We assembled 3–3.2 m top rails and secured 0.3 m of metal pipe to the top using a gate hinge. Two pulleys were attached using metal screws and we fed the rope and electrical wire through each pulley. (D) The rail system was placed inside the PVC pipe and secured in place as previously described until the PVC pipe was filled with 2/3 of packed sand. The remaining top 1/3 was filled with quick dry cement following manufacturer's instructions. .
